# Supplementary figures and images for: The LRRK2 G2019S mutation alters astrocyte-to-neuron communication via extracellular vesicles and induces neuron atrophy in a human iPSC-derived model of Parkinson’s disease
Source: eLife journal article supplement (doi:10.7554/elife.73062), 2021-09-30

A

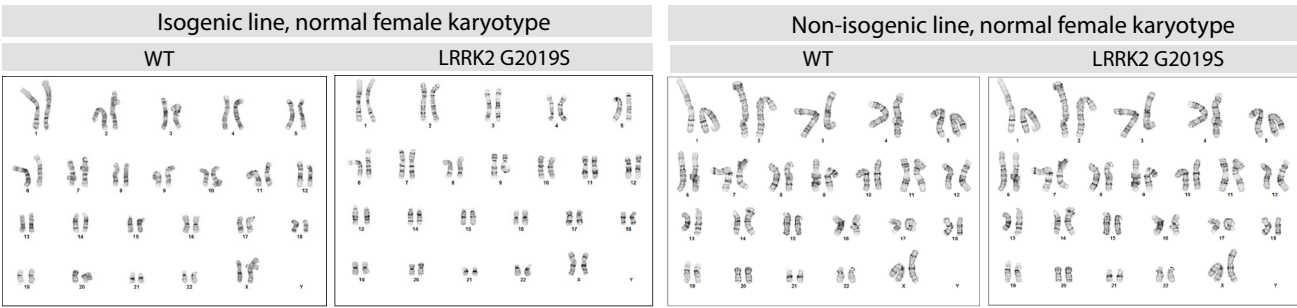

B

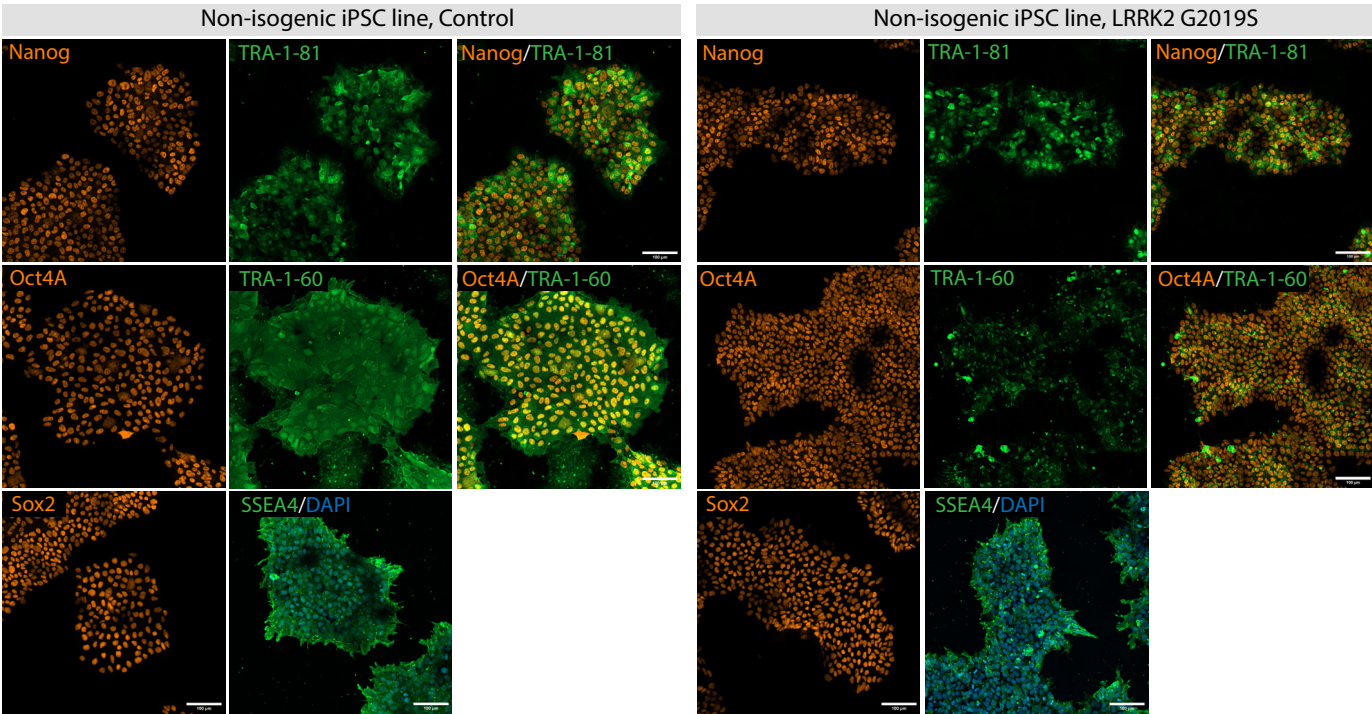

C

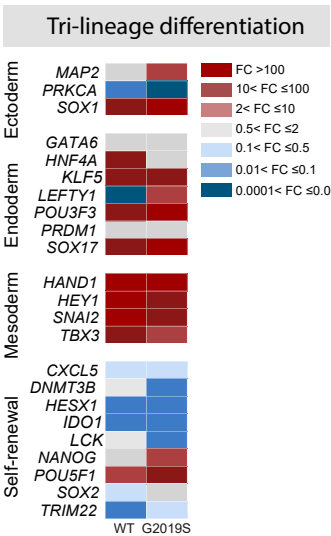

D

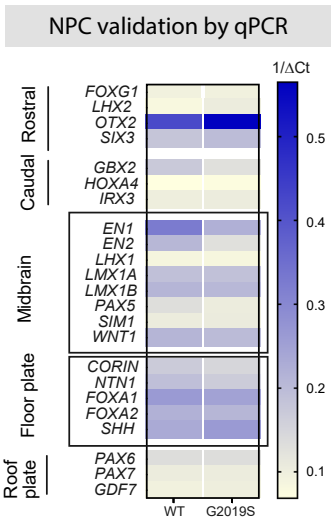

E

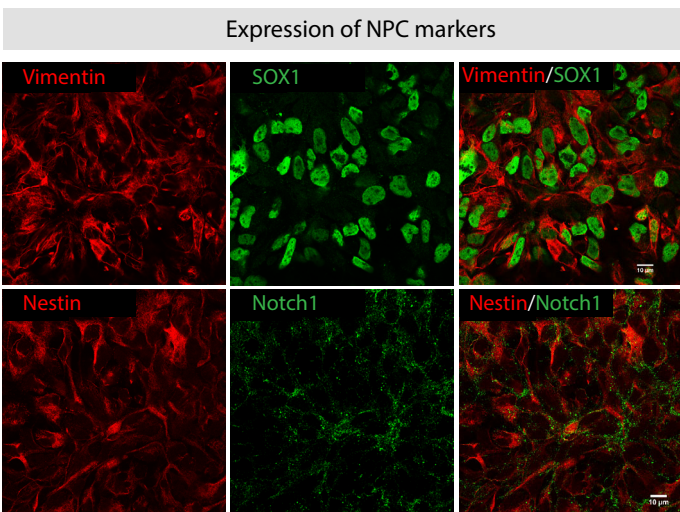

Supplementary Figure 1

Supplement: supp [file elife_poa_e73062_Figure_1_figure_supplement_1.pdf › elife_poa_e73062_Figure_1_figure_supplement_1.pdf]

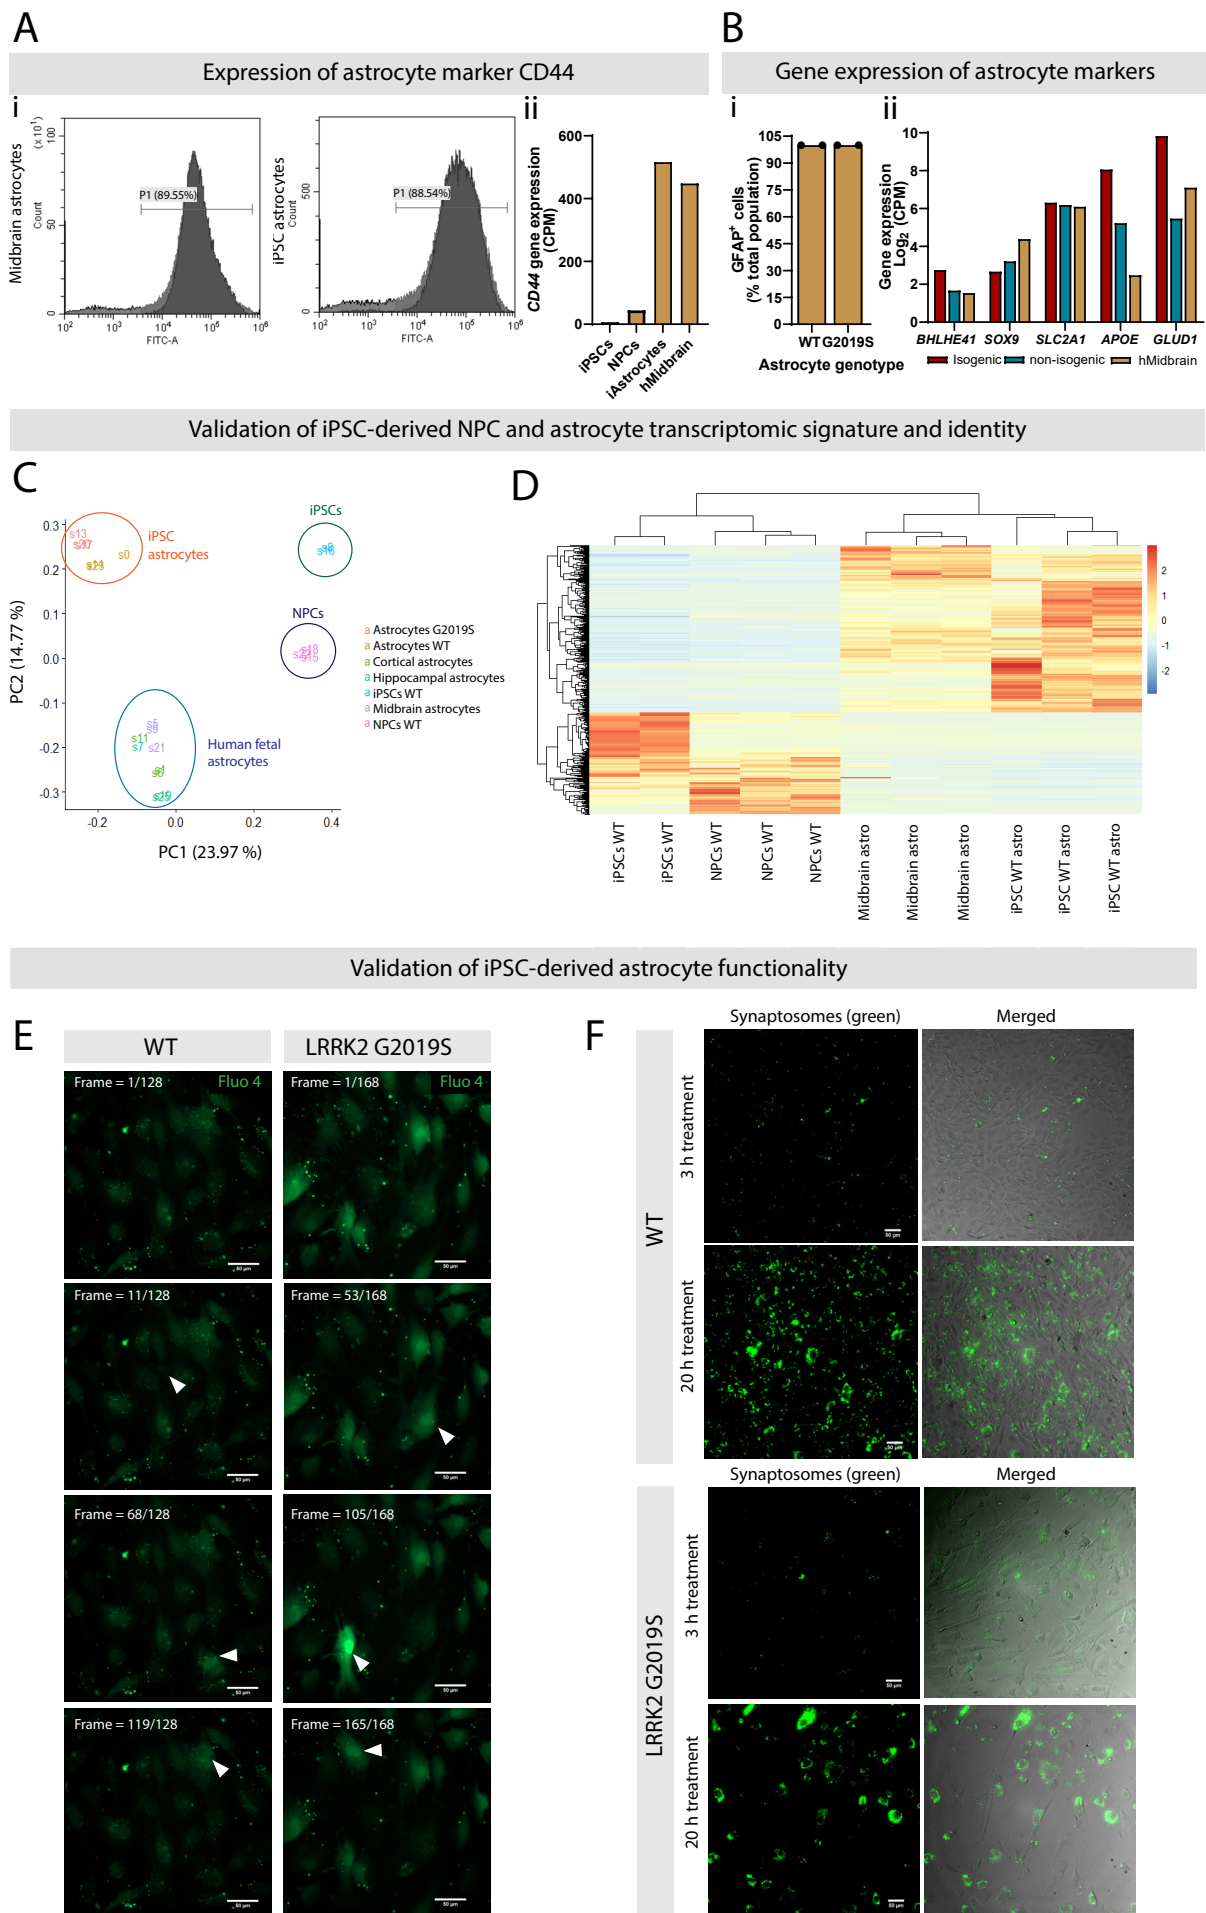

Supplementary Figure 2

Supplement: supp [file elife_poa_e73062_Figure_1_figure_supplement_2.pdf › elife_poa_e73062_Figure_1_figure_supplement_2.pdf]

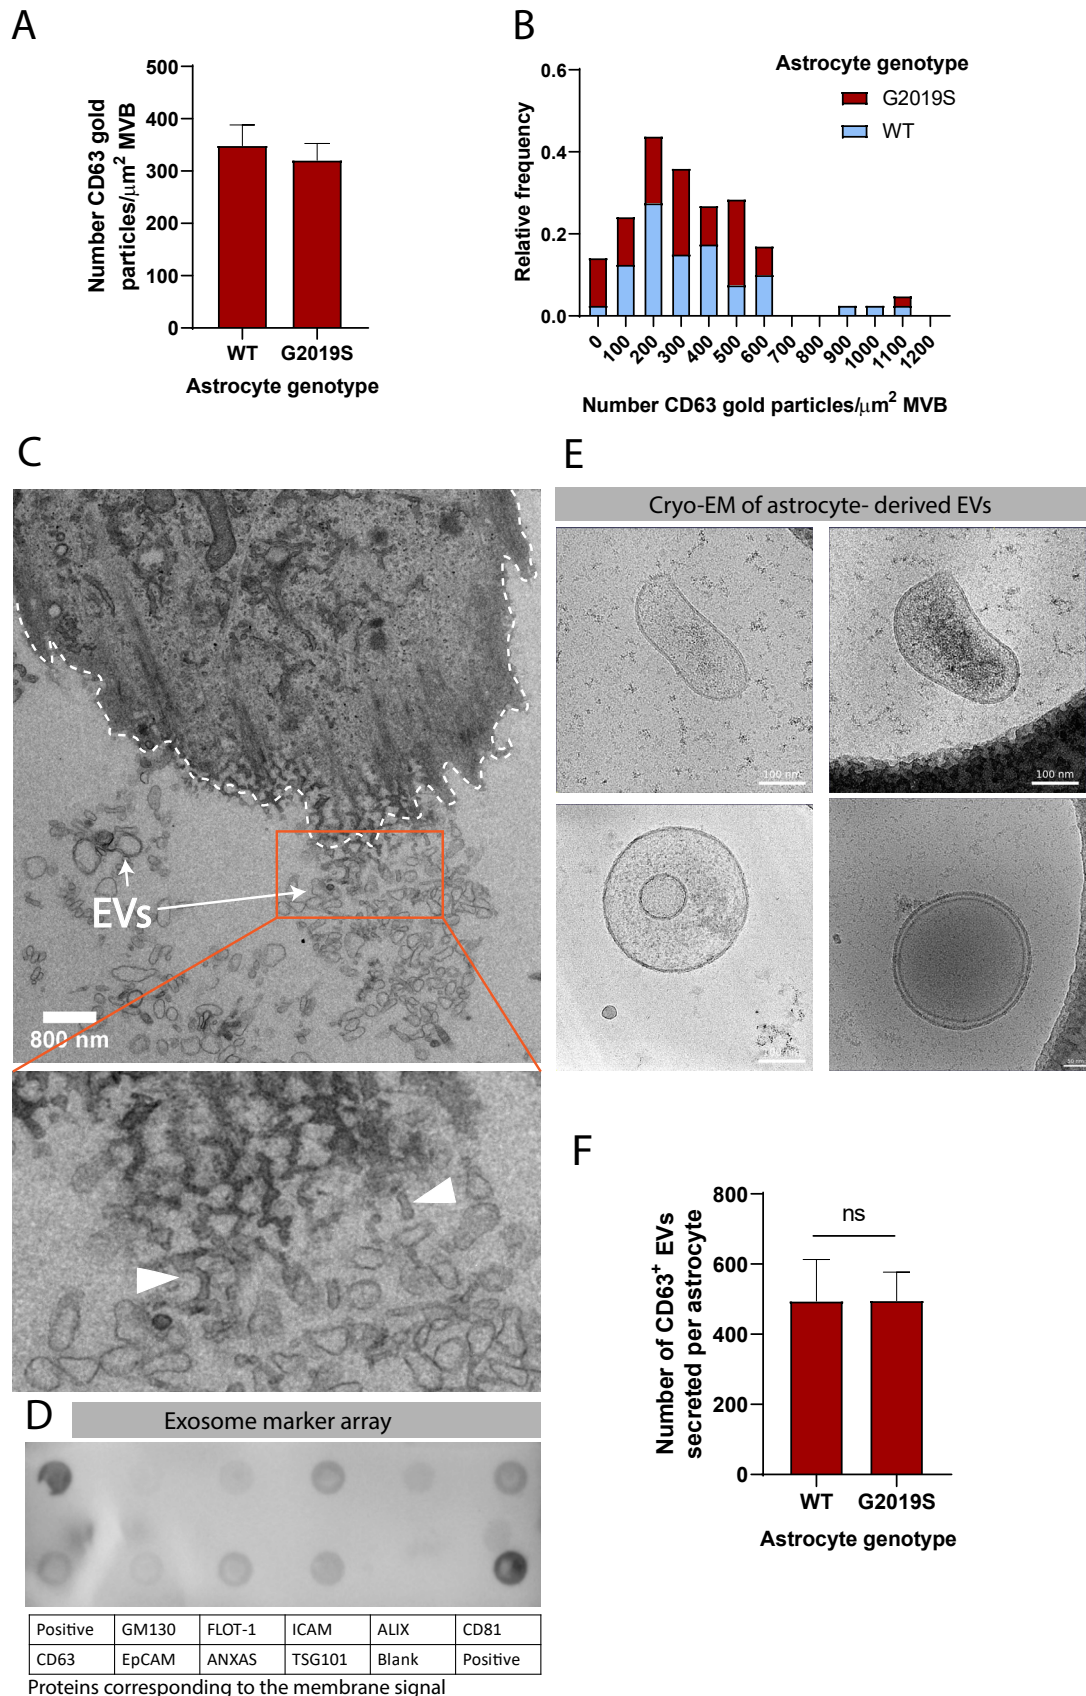

Supplementary Figure 3

Supplement: supp [file elife_poa_e73062_Figure_3_figure_supplement_1.pdf › elife_poa_e73062_Figure_3_figure_supplement_1.pdf]

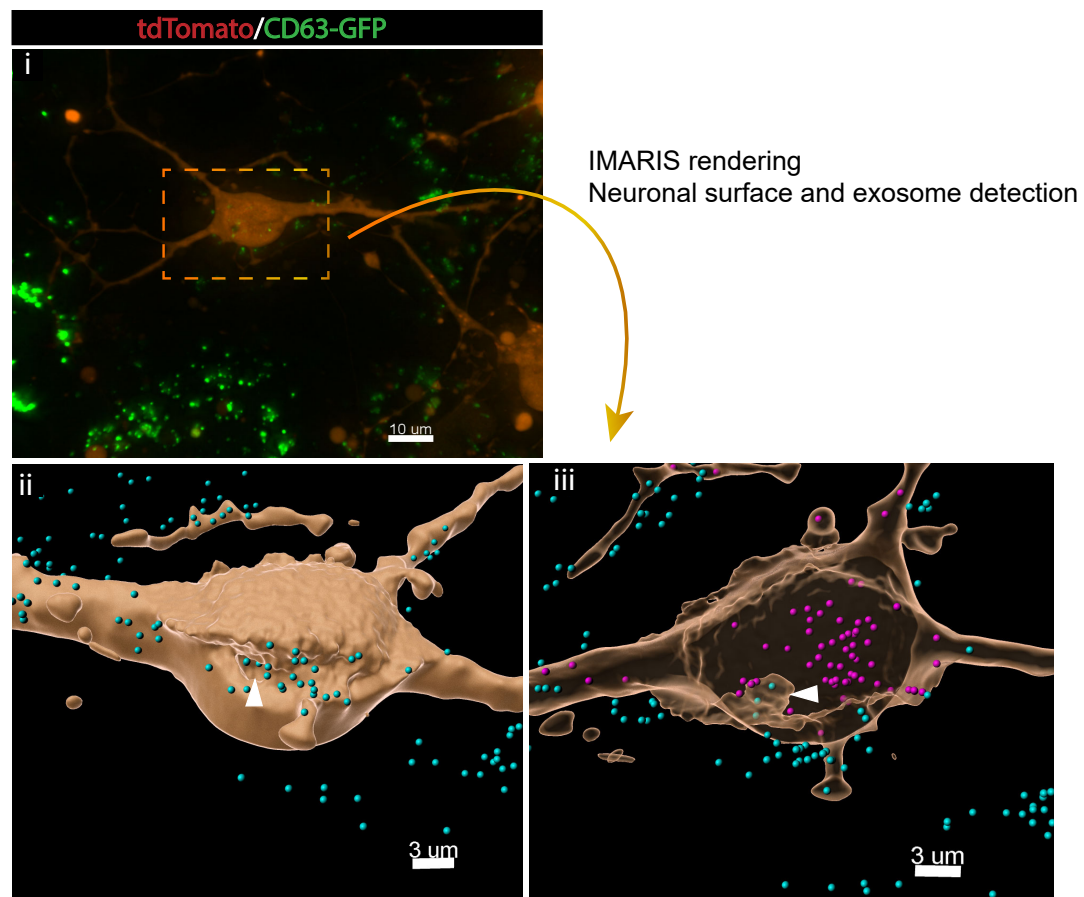

Supplementary Figure 4

Supplement: supp [file elife_poa_e73062_Figure_7_figure_supplement_1.pdf › elife_poa_e73062_Figure_7_figure_supplement_1.pdf]

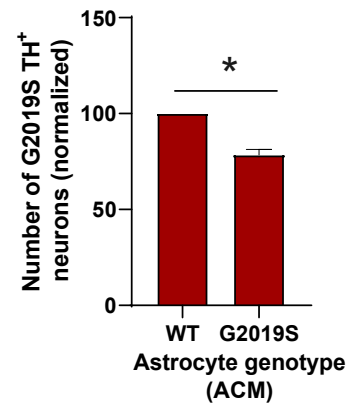

Supplementary Figure 5

Supplement: supp [file elife_poa_e73062_Figure_9_figure_supplement_1.pdf › elife_poa_e73062_Figure_9_figure_supplement_1.pdf]
